# Supplementary material for: The Socioecology of Territory Size and a "Work-Around" Hypothesis for the Adoption of Farming
Source: PLoS One. 2016 Jul 8;11(7):e0158743. doi: 10.1371/journal.pone.0158743 (PMC4938390; doi:10.1371/journal.pone.0158743)
Supplement: S1 Table — (XLS) [file pone.0158743.s002.xls]

## Sheet: Sheet1
Group	Lat	Long	Population	Area_km2	Area/Person	Reference	Foraging	Cultivation	Pastoral	Market	ActualEvapo
Mapuche	-41.15	-71.24	296	10.43	0.0352365	Faron 1961:26	0.5	70	20	10	449.927
Xhosa Shixini	-32.2	28.45	4793	50	0.0104319	McAllister 2001:20, 28	2.5	70	7.5	20	881.723
Bhaca	-28.5	31.09	55000	1792.08	0.0325833	Hammond-Tooke 1962:XV	6	85	9	0	895.57
Swazi	-26.5	31.5	130000	6192	0.0476308	Beemer 1939:201	7.5	70	5	17.5	719.106
Tswana (Tolkwa)	-24	27	5000	120	0.024	Grtivette 1978:1206, Grtivette 1979:245	6	70	14	10	452.838
Cayua	-23	-54	175	200	1.14286	Watson 1945:3, 7-8	25	70	0	5	1005.73
Pedi	-22.9	31.7	118743	3676	0.0309576	Monnig 1967: 3	10	70	5	15	438.875
Betsileo (subprefecture)	-18.78	47.46	237489	9266	0.0390165	Kottak 1980:Table 4	10	75	5	10	1112.82
Valley Gwembe Tonga (middle river)	-17	27	86000	38835	0.45157	Colson 1960:3-4, 6-7	20	70	5	5	721.191
Goba	-15.85	29.67	7800	1401.7	0.179705	Lancaster 1981:94,111	17	70	3	10	659.984
Siriono	-15	-63.58	300	517.8	1.726	Holmberg 1969:1,12	80	20	0	0	972.511
Lozi	-14.47	26.02	7620	1088	0.142782	Gluckman 1941:4	21	69	5	5	735.898
Tikopia	-12.27	168.83	1281	7.8	0.00608899	Firth 1939:39	4	94	1	0	1000
Matsigenka	-12	-73	8212	27375	3.33354	Johnson 2003:Map 1, 142	10	90	0	0	1033.61
Bemba	-11	31	114274	52400	0.458547	Whiteley 1950:1,7	21	75	4	0	781.233
Wonie	-9.08	143.2	1300	4000	3.07692	Ohtuska 1983:10	1	99	0	0	1530.89
Uchucmarca	-7.1	-77.8	2278	210	0.0921861	Brush 1977:25,32	0.5	80	10	10	821.626
Maring(Bomagai-Angoiang)	-5	145	154	71.5	0.464286	Clarke 1971:19, Map	4	95	1	0	1308.98
Tsembaga	-5	145	204	7.74	0.0379412	Rappaport 1968:14, 33-34	8.2	90	0.8	0	1308.98
Sandawe	-3.5	35.5	20000	1256	0.0628	Newman 1970:17-18	32.5	62.5	5	0	661.345
Nuaulu	-3.26	129.1	496	214	0.431452	Ellen 1978:12,63	46	54	0	0	1014
Ka'apor	-3.1	-46	520	5305	10.2019	Balee 1994:2	20	80	0	0	961.203
Tana Toraja	-3	120	314404	3178	0.010108	Nooy-Palm 1979:Annex 1b, 3	1	78	1	20	862.564
Sonjo	-2.23	35.85	4500	1800	0.4	Gray 1963: 25-26	5	80	15	0	501.302
Boyela (4 subtribes)	-1	23.25	2200	1000	0.454545	Sato 1983:5	15	84	1	0	1237
Amba	0.5	30	30590	429.68	0.0140464	Winter 1955:4	2	65	5	28	1071.96
Sebei (Sasur)	1.13	34.55	400	1.036	0.00259	Goldschmidt 1976:52	5	65	10	20	1035.71
Yanoama	2.5	-65	15000	77400	5.16	Smole 1976:3	25	75	0	0	1202.72
Iban	2.55	112.36	11348	3354	0.295559	Freeman 1970:61,64	22.5	70	2.5	5	1060.67
Nukak	2.56	-71.81	400	10000	25	Politis 2007:44,162	79	20	0	1	1390.09
Lugbara	3	31.25	183000	3155	0.0172404	Middleton and Greenland 1954:447	5	70	10	15	1045.66
Semai	4.5	102	12748	2194	0.172105	Dentan 1968:8	27.5	70	2.5	0	818.026
Guahibo	5.38	-68.31	17000	50000	2.94118	Morey and Metzger 1974:12-13	55	45	0	0	1008.36
Azande	5.41	27.11	750000	70286	0.0937147	De Schlipple 1956:4-5; Baxter and Butt 1953:13	25	75	0	0	1024
NE Igbo	6	8	421000	2620	0.00622328	Jones 1961:Table 1, 120	5	90	5	0	1130.76
Panare	6	-65	1708	20000	11.7096	Henley 1982:xiii,Table 1	25	75	0	0	999.685
Tiv	7	9	455	4.78	0.0105055	Bohannan and Bohannan 1953:21	11	75	5	9	1050.7
Nuer	8.5	31.5	200000	77720	0.3886	Evans-Pritchard 1940:109-112	40	25	35	0	744.772
Kofyar (Bong)	9	9.16	72964	491.91	0.00674182	Netting 1968:110-111	10	75	5	10	837.648
Ulithi	9.97	139.67	421	4.7	0.0111639	Lessa 1950:10,22	5	90	5	0	1000
Yukpa	10	-7.76	2176	2826	1.29871	Ruddle 1974:28-29	2.9	96.2	0	0.9	895.904
Hanunoo	12.46	121.36	141	6.2	0.0439716	Conklin 1957:16,146	11	88	1	0	956.98
Miskito	12.6	-83.7	1000	1037.47	1.03747	Nietschman 1973:17, 144	8	74	0	18	1247.55
Dogon	14.21	-3.37	360019	53000	0.147214	Monserrat 1957:6,16	12.5	75	2	10	510.041
Tigrinya (Mai Weini)	15.31	38.91	52000	850	0.0163462	Tronvoll 1998:47	7.5	70	2.5	20	492.922
Kekchi_Maya	16.05	-89.15	173	58.695	0.339277	Wilk 1997:80	15	75	5	5	1324.94
Ifugao (subarea)	16.5	121	10000	100	0.01	Conklin 1967:101	10	80	5	5	856.446
Lamet	20.9	101.4	5795	2000	0.345125	Izikowitz 1951:38	13	75	12	0	599.145
Khasi	25.32	91.19	289514	14329.3	0.0494944	McCormack 1964:105-106	5	55	5	35	596.363
Garo	25.35	90.25	138274	8160.52	0.059017	Majumdar 1978:16; Playfair 1909:1	23	62	5	10	641.589
Tarahumara gentiles	26.48	-107.04	142	40	0.28169	Kennedy 1978: 40	10	85	5	0	664.888
Hasinai	31.02	-94.48	5000	18000	3.6	Griffith 1954: 58, Map	50	50	0	0	768.733
Cocopa	32.5	-114.75	1500	3072	2.048	Kelly 1977:10,12	60	40	0	0	400.164
Creek	33	-83	19309	58514	3.0304	Swanton 1922:456	40	60	0	0	668.482
Mohave	35	-114	3000	4200	1.4	Castetter and Bell 1951:47; Stewart 1983:55	50	50	0	0	208.748
Havasupai	36.13	-112.36	250	7740	30.96	Spier 1928:92, 98; Whiting 1985: 7	60	40	0	0	323.491
Hunzakut	36.5	75	32300	7900	0.244582	Sidky 1993:145,147	1	75	5	19	231.763
Powhatan	36.54	-76.18	4286	9579	2.23495	Binford 1991:Table 17	55	45	0	0	746.7
Delaware	40	-75.45	11000	43000	3.90909	Newcomb 1956:10; Goddard 1978:214	60	40	0	0	688.785
Huron	44	-78	18000	1812	0.100667	Trigger 1969:9,12-13	25	75	0	0	651.958
Hidatsa	47.5	-101.3	4000	42500	10.625	Stewart 2001:330, 344	50	50	0	0	427.717
