# Supplementary material for: The Socioecology of Territory Size and a "Work-Around" Hypothesis for the Adoption of Farming
Source: PLoS One. 2016 Jul 8;11(7):e0158743. doi: 10.1371/journal.pone.0158743 (PMC4938390; doi:10.1371/journal.pone.0158743)
Supplement: S2 Table — (XLSX) [file pone.0158743.s004.xlsx]

## Sheet: HgData
Society	GpNo	HUNTING	AREA_100km2	AREA_km2	Population	MCM_degrees_C	CRR	wcont	Reference
Punan	1	30	29.6	2960	349	26	3444.32	EURASIA	Binford 2001: Tables 4.01 and 5.01
Batek	2	30	9.8	980	424	26.89	2546.76	EURASIA	Binford 2001: Tables 4.01 and 5.02
Kubu	3	25	1282.6	128260	11800	25.5	3138.13	EURASIA	Binford 2001: Tables 4.01 and 5.03
Shompen	4	15	8.6	860	342	26.7	3189.8	INDIA	Binford 2001: Tables 4.01 and 5.04
Onge	5	20	9.8	980	393	26.04	3081.84	INDIA	Binford 2001: Tables 4.01 and 5.05
Jarwa	6	20	5.7	570	255	25.36	2301.48	INDIA	Binford 2001: Tables 4.01 and 5.06
Ayta-Pinatubo	7	8	17.9	1790	1645	25.39	3051.2	EURASIA	Binford 2001: Tables 4.01 and 5.07
North Island	8	35	13.9	1390	464	25.11	1752.74	INDIA	Binford 2001: Tables 4.01 and 5.08
Semang	9	40	20.8	2080	366	24.01	2560.7	EURASIA	Binford 2001: Tables 4.01 and 5.09
Veddah	10	30	3.9	390	72	25.56	1728.16	INDIA	Binford 2001: Tables 4.01 and 5.10
Hill-Pandaran	11	16	7.9	790	556	25.56	850.62	INDIA	Binford 2001: Tables 4.01 and 5.11
Agta (Casiguran)	12	15	7	700	609	23.72	2713.72	EURASIA	Binford 2001: Tables 4.01 and 5.12
Agta (Isbela)	13	20	39.1	3910	1644	23.72	1806.97	EURASIA	Binford 2001: Tables 4.01 and 5.13
Agta (North Luzon)	14	35	1.2	120	46	23.47	1941.83	EURASIA	Binford 2001: Tables 4.01 and 5.14
Chenchu	15	10	3.4	340	426	22.47	1410.24	INDIA	Binford 2001: Tables 4.01 and 5.15
Mrabri	16	20	6	600	139	21.53	1141.75	EURASIA	Binford 2001: Tables 4.01 and 5.16
Paliyans	17	14	311.6	31160	3000	19.03	1124.6	INDIA	Binford 2001: Tables 4.01 and 5.17
Birhor	18	35	28.6	2860	629	16.19	1367.21	INDIA	Binford 2001: Tables 4.01 and 5.18
Kadar	19	5	11.3	1130	565	12.5	1672.3	INDIA	Binford 2001: Tables 4.01 and 5.19
Cholanaickan	20	15	3.6	360	254	12.5	1282.26	INDIA	Binford 2001: Tables 4.01 and 5.20
Nayaka	21	10	1	100	70	12.5	1008.28	INDIA	Binford 2001: Tables 4.01 and 5.21
Ainu (Hokkaido)	22	15	3.5	350	122	-7.43	807.06	EURASIA	Binford 2001: Tables 4.01 and 5.22
Orogens	23	65	744	74400	3200	-26.46	406.476	EURASIA	Binford 2001: Tables 4.01 and 5.23
Ket	24	45	625	62500	1000	-24.17	524.882	EURASIA	Binford 2001: Tables 4.01 and 5.24
Gilyak	25	12	76.7	7670	4600	-21.56	440.642	EURASIA	Binford 2001: Tables 4.01 and 5.25
Yukaghir	26	55	3868.8	386880	2360	-36.92	158.662	EURASIA	Binford 2001: Tables 4.01 and 5.26
Nganasan	27	55	1904.3	190430	876	-28.06	288.871	EURASIA	Binford 2001: Tables 4.01 and 5.27
Siberian Eskimo	28	30	274.9	27490	1292	-20.47	330.785	EURASIA	Binford 2001: Tables 4.01 and 5.28
Paraujano	29	10	142.8	14280	5000	27.39	1453.05	SA	Binford 2001: Tables 4.01 and 5.29
Shiriana	30	35	76.9	7690	1200	26.22	2294.35	SA	Binford 2001: Tables 4.01 and 5.30
Akuriyo	31	40	16.4	1640	66	26.06	2039.07	SA	Binford 2001: Tables 4.01 and 5.31
Yaruro-pume	32	6	8.2	820	164	26.28	1839.05	SA	Binford 2001: Tables 4.01 and 5.32
Guahibo	33	20	87.4	8740	1540	25.72	2571.14	SA	Binford 2001: Tables 4.01 and 5.33
Nukak	34	11	30.1	3010	282	22.28	2470.54	SA	Binford 2001: Tables 4.01 and 5.34
Bororo	35	20	16.5	1650	850	22.5	1721.35	SA	Binford 2001: Tables 4.01 and 5.35
Guato	36	10	66.8	6680	450	22.08	1218.72	SA	Binford 2001: Tables 4.01 and 5.36
Siriono	37	50	15.6	1560	94	22.06	1466.61	SA	Binford 2001: Tables 4.01 and 5.37
Yuqui	38	60	25.8	2580	43	21.97	2358.02	SA	Binford 2001: Tables 4.01 and 5.38
Nambikwara	39	20	30.2	3020	235	21	549.5	SA	Binford 2001: Tables 4.01 and 5.39
Calusa	40	10	142	14200	5500	17.61	1351.3	NA	Binford 2001: Tables 4.01 and 5.40
Guayaki (Ache)	41	62	28.7	2870	100	16.83	1534.16	SA	Binford 2001: Tables 4.01 and 5.41
Botocudo	42	30	510	51000	5000	16.81	1297.6	SA	Binford 2001: Tables 4.01 and 5.42
Heta	43	35	3.1	310	30	15.11	1505.2	SA	Binford 2001: Tables 4.01 and 5.43
Aweikomo	44	60	26	2600	106	14.56	1587.07	SA	Binford 2001: Tables 4.01 and 5.44
Tehuelche	45	65	4753	475300	9000	5.5	182.159	SA	Binford 2001: Tables 4.01 and 5.45
Chono	46	20	153.9	15390	2100	4.78	2399.86	SA	Binford 2001: Tables 4.01 and 5.46
Alacaluf	47	20	226.9	22690	3400	5.14	3649.84	SA	Binford 2001: Tables 4.01 and 5.47
Ona	48	75	38	3800	3500	1.11	476.323	SA	Binford 2001: Tables 4.01 and 5.48
Yahgan	49	25	75	7500	2700	1.78	524.803	SA	Binford 2001: Tables 4.01 and 5.49
Aka	50	20	120	12000	1088	24.72	1758.11	AFRICA	Binford 2001: Tables 4.01 and 5.50
Bayaka	51	9	70	7000	1223	24.72	1751.09	AFRICA	Binford 2001: Tables 4.01 and 5.51
Bambote	52	14	37.5	3750	937	23.28	1241.07	AFRICA	Binford 2001: Tables 4.01 and 5.52
Baka	53	14	220	22000	3000	23.28	1648.5	AFRICA	Binford 2001: Tables 4.01 and 5.53
Efe	54	11	47	4700	750	22.36	1556.46	AFRICA	Binford 2001: Tables 4.01 and 5.54
Mbuti	55	9	34	3400	1496	21.11	1576.71	AFRICA	Binford 2001: Tables 4.01 and 5.55
Mikea	56	15	68.8	6880	300	20.39	397.357	AFRICA	Binford 2001: Tables 4.01 and 5.56
Hukwe	57	35	43	4300	124	16.97	763.684	AFRICA	Binford 2001: Tables 4.01 and 5.57
Hai//Om	58	45	520	52000	2000	16.33	517.16	AFRICA	Binford 2001: Tables 4.01 and 5.58
Hadza	59	40	25	2500	600	16.5	780.649	AFRICA	Binford 2001: Tables 4.01 and 5.59
Dorobo (Okiek)	60	55	3.7	370	151	16.28	1246.33	AFRICA	Binford 2001: Tables 4.01 and 5.60
Sekele	61	35	2300	230000	3500	14.42	618.502	AFRICA	Binford 2001: Tables 4.01 and 5.61
!Kung	62	33	110	11000	726	14.78	405.602	AFRICA	Binford 2001: Tables 4.01 and 5.62
Nharo	63	30	600	60000	7500	12.98	385.6	AFRICA	Binford 2001: Tables 4.01 and 5.63
G/Wi	64	45	180	18000	528	12.93	333.841	AFRICA	Binford 2001: Tables 4.01 and 5.64
Kua	65	45	150	15000	954	12.65	354.202	AFRICA	Binford 2001: Tables 4.01 and 5.65
!Ko	66	45	118	11800	122	10.72	281.502	AFRICA	Binford 2001: Tables 4.01 and 5.66
/Auni-khomani	67	48	570	57000	364	10.79	123.77	AFRICA	Binford 2001: Tables 4.01 and 5.67
//Xegwi	68	50	78.4	7840	280	11.5	918.72	AFRICA	Binford 2001: Tables 4.01 and 5.68
/Xam	69	70	123.5	12350	300	9.5	209.04	AFRICA	Binford 2001: Tables 4.01 and 5.69
Kaurareg	70	0	4	400	140	24.57	1749.39	AUSTRALIA	Binford 2001: Tables 4.01 and 5.70
Larikia	71	15	39	3900	1560	24.89	1811.75	AUSTRALIA	Binford 2001: Tables 4.01 and 5.71
Gunwinggu	72	35	73	7300	1302	25.15	1391.51	AUSTRALIA	Binford 2001: Tables 4.01 and 5.72
Mirrngadja	73	10	2	200	77	24.31	1351.21	AUSTRALIA	Binford 2001: Tables 4.01 and 5.73
Anbara	74	10	0.8	80	35	23.98	1303.74	AUSTRALIA	Binford 2001: Tables 4.01 and 5.74
Gidjingali	75	10	5.5	550	400	23.65	1256.38	AUSTRALIA	Binford 2001: Tables 4.01 and 5.75
Murngin (Yolngu)	76	35	50	5000	588	23.6	1245.7	AUSTRALIA	Binford 2001: Tables 4.01 and 5.76
Jeidji (Forest-river)	77	15	26	2600	442	24.22	638.82	AUSTRALIA	Binford 2001: Tables 4.01 and 5.77
Wikmunkan	78	30	83	8300	698	23.02	1750.1	AUSTRALIA	Binford 2001: Tables 4.01 and 5.78
Kakadu	79	20	60	6000	528	23.09	1315.8	AUSTRALIA	Binford 2001: Tables 4.01 and 5.79
Nunggubuyu	80	10	70	7000	1610	23.02	956.06	AUSTRALIA	Binford 2001: Tables 4.01 and 5.80
Yintjingga	81	5	7	700	217	22.39	1723.9	AUSTRALIA	Binford 2001: Tables 4.01 and 5.81
Yir-yoront	82	25	13	1300	104	22.76	1145.51	AUSTRALIA	Binford 2001: Tables 4.01 and 5.82
Tiwi	83	25	71	7100	2662	21.97	1681.39	AUSTRALIA	Binford 2001: Tables 4.01 and 5.83
Kuku-yalanji	84	10	13	1300	650	21.89	1906.86	AUSTRALIA	Binford 2001: Tables 4.01 and 5.84
Groote-eylandt	85	10	26	2600	595	21.89	1122.62	AUSTRALIA	Binford 2001: Tables 4.01 and 5.85
Walmbaria	86	5	1.3	130	75	21.61	1128.28	AUSTRALIA	Binford 2001: Tables 4.01 and 5.86
Mulluk	87	10	10	1000	445	21.49	1498.27	AUSTRALIA	Binford 2001: Tables 4.01 and 5.87
Worora	88	30	104	10400	1114	20.94	1280.67	AUSTRALIA	Binford 2001: Tables 4.01 and 5.88
Lungga	89	35	125	12500	562	20.94	587.133	AUSTRALIA	Binford 2001: Tables 4.01 and 5.89
Lardil	90	5	4	400	120	20.55	1207.2	AUSTRALIA	Binford 2001: Tables 4.01 and 5.90
Kaiadilt	91	7	2.5	250	165	20.55	1155.31	AUSTRALIA	Binford 2001: Tables 4.01 and 5.91
Karadjeri	92	40	143	14300	536	20.25	445.967	AUSTRALIA	Binford 2001: Tables 4.01 and 5.92
Mamu	93	7	13	1300	585	19.17	3534.41	AUSTRALIA	Binford 2001: Tables 4.01 and 5.93
Kariera	94	10	117	11700	1111	18.67	303.862	AUSTRALIA	Binford 2001: Tables 4.01 and 5.94
Warunggu	95	42	96	9600	1562	18.5	2122.22	AUSTRALIA	Binford 2001: Tables 4.01 and 5.95
Djaru	96	30	338	33800	1345	17.53	413.866	AUSTRALIA	Binford 2001: Tables 4.01 and 5.96
Walbiri	97	30	1378	137800	1598	17.39	334.5	AUSTRALIA	Binford 2001: Tables 4.01 and 5.97
Ngatjan	98	15	5	500	299	17.5	1901.2	AUSTRALIA	Binford 2001: Tables 4.01 and 5.98
Mardudjara	99	30	226	22600	169	15.49	298.01	AUSTRALIA	Binford 2001: Tables 4.01 and 5.99
Ildawongga	100	20	787	78700	354	15.46	317.08	AUSTRALIA	Binford 2001: Tables 4.01 and 5.100
Pintubi	101	35	229	22900	343	14.56	314.47	AUSTRALIA	Binford 2001: Tables 4.01 and 5.101
Undanbi	102	5	23	2300	500	15	1017.79	AUSTRALIA	Binford 2001: Tables 4.01 and 5.102
Jinibarra	103	30	13.7	1370	219	15	1018.2	AUSTRALIA	Binford 2001: Tables 4.01 and 5.103
Karuwali	104	35	330	33000	660	13.5	248.911	AUSTRALIA	Binford 2001: Tables 4.01 and 5.104
Alyawara	105	35	463	46300	560	13.54	300.308	AUSTRALIA	Binford 2001: Tables 4.01 and 5.105
Ngatatjara	106	25	780	78000	312	12.89	244.47	AUSTRALIA	Binford 2001: Tables 4.01 and 5.106
Badjalang	107	25	60	6000	804	14.06	881.224	AUSTRALIA	Binford 2001: Tables 4.01 and 5.107
Pitjandjara	108	35	598	59800	358	12.59	245.37	AUSTRALIA	Binford 2001: Tables 4.01 and 5.108
Dieri	109	25	218	21800	420	12.69	184.08	AUSTRALIA	Binford 2001: Tables 4.01 and 5.109
Arenda (southern)	110	30	455	45500	500	12.56	175.88	AUSTRALIA	Binford 2001: Tables 4.01 and 5.110
Jankundjara	111	35	572	57200	572	11.99	189.27	AUSTRALIA	Binford 2001: Tables 4.01 and 5.111
Arenda (northern)	112	45	767	76700	2045	11.73	277.63	AUSTRALIA	Binford 2001: Tables 4.01 and 5.112
Ualaria	113	35	120	12000	1080	11.78	403.55	AUSTRALIA	Binford 2001: Tables 4.01 and 5.113
Nakako	114	45	494	49400	429	11.47	213.8	AUSTRALIA	Binford 2001: Tables 4.01 and 5.114
Ooldea	115	45	637	63700	300	11.48	200.2	AUSTRALIA	Binford 2001: Tables 4.01 and 5.115
Barkindji	116	25	195	19500	3008	10.38	215.31	AUSTRALIA	Binford 2001: Tables 4.01 and 5.116
Karuna	117	20	72	7200	1296	11.44	535.6	AUSTRALIA	Binford 2001: Tables 4.01 and 5.117
Wongaibon	118	35	701.1	70110	3589	9.46	348.643	AUSTRALIA	Binford 2001: Tables 4.01 and 5.118
Jaralde	119	15	5	500	200	10.74	346.81	AUSTRALIA	Binford 2001: Tables 4.01 and 5.119
Mineng	120	30	127	12700	889	12	1007.61	AUSTRALIA	Binford 2001: Tables 4.01 and 5.120
Tjapwurong	121	20	70	7000	2450	8.61	356.465	AUSTRALIA	Binford 2001: Tables 4.01 and 5.121
Bunurong	122	25	78	7800	1953	10	760.56	AUSTRALIA	Binford 2001: Tables 4.01 and 5.122
Kurnai	123	45	19	1900	336	7.03	633.837	AUSTRALIA	Binford 2001: Tables 4.01 and 5.123
Tasmanians (eastern)	124	35	85.7	8570	700	6.72	610.608	AUSTRALIA	Binford 2001: Tables 4.01 and 5.124
Tasmanians (western)	125	25	33.7	3370	450	7.17	1690.19	AUSTRALIA	Binford 2001: Tables 4.01 and 5.125
Seri	126	10	21.6	2160	550	16.72	285.858	NA	Binford 2001: Tables 4.01 and 5.126
Cahuilla	127	25	84	8400	3675	12.11	79.813	NA	Binford 2001: Tables 4.01 and 5.127
Cupeno	128	25	4	400	195	11.5	209.426	NA	Binford 2001: Tables 4.01 and 5.128
Kiliwa	129	15	36.4	3640	445	12.25	203.876	NA	Binford 2001: Tables 4.01 and 5.129
Diegueno	130	25	166	16600	3000	11.36	275.411	NA	Binford 2001: Tables 4.01 and 5.130
Lake Yokuts	131	20	170.7	17070	6500	8.44	168.284	NA	Binford 2001: Tables 4.01 and 5.131
Serrano	132	40	199	19900	3500	9.06	235.345	NA	Binford 2001: Tables 4.01 and 5.132
Luiseno	133	15	81.2	8120	5500	11.07	314.334	NA	Binford 2001: Tables 4.01 and 5.133
Wukchumi	134	40	3.8	380	92	7.89	654.232	NA	Binford 2001: Tables 4.01 and 5.134
Tubatulabal	135	35	58	5800	1000	7.14	211.465	NA	Binford 2001: Tables 4.01 and 5.135
Nomlaki	136	30	45	4500	3125	6.93	510.734	NA	Binford 2001: Tables 4.01 and 5.136
Northern Foothill Yokuts	137	25	9.4	940	360	7.19	472.417	NA	Binford 2001: Tables 4.01 and 5.137
Patwin	138	30	18.5	1850	1517	7.46	445.67	NA	Binford 2001: Tables 4.01 and 5.138
Gabrielino	139	10	77	7700	5000	9.22	518.717	NA	Binford 2001: Tables 4.01 and 5.139
Monache	140	30	13.5	1350	387	4.83	128.727	NA	Binford 2001: Tables 4.01 and 5.140
Eastern Pomo	141	15	7.4	740	940	7.56	819.963	NA	Binford 2001: Tables 4.01 and 5.141
Clear-Lake Pomo	142	10	5.4	540	2099	7.72	913.617	NA	Binford 2001: Tables 4.01 and 5.142
Wintu	143	25	68	6800	4000	5.69	986.254	NA	Binford 2001: Tables 4.01 and 5.143
Chumash	144	5	18	1800	2124	11.22	390.028	NA	Binford 2001: Tables 4.01 and 5.144
Chimariko	145	30	9.9	990	450	5.61	1522.88	NA	Binford 2001: Tables 4.01 and 5.145
Nisenan	146	30	120	12000	4770	6.42	958.862	NA	Binford 2001: Tables 4.01 and 5.146
Salinan	147	20	94	9400	3500	9.3	422.892	NA	Binford 2001: Tables 4.01 and 5.147
Pomo (Southern)	148	15	20.3	2030	2250	8.02	889.614	NA	Binford 2001: Tables 4.01 and 5.148
Sinkyone	149	15	9	900	868	6.83	1357.4	NA	Binford 2001: Tables 4.01 and 5.149
Lessik	150	20	18.2	1820	1770	5.72	1126.43	NA	Binford 2001: Tables 4.01 and 5.150
Miwok (Coast)	151	10	28	2800	1500	8.28	807.342	NA	Binford 2001: Tables 4.01 and 5.151
Mattole	152	10	5.6	560	652	7.78	1298.42	NA	Binford 2001: Tables 4.01 and 5.152
Miwok (Lake)	153	10	3.5	350	227	8.09	718.421	NA	Binford 2001: Tables 4.01 and 5.153
Yuki (Proper)	154	15	30.4	3040	4000	4.83	1186.35	NA	Binford 2001: Tables 4.01 and 5.154
Wappo	155	15	9.7	970	1170	8.03	861.158	NA	Binford 2001: Tables 4.01 and 5.155
Pomo (Northern)	156	20	31	3100	3360	8.25	1264.85	NA	Binford 2001: Tables 4.01 and 5.156
Yana	157	25	58.1	5810	1820	3.01	941.202	NA	Binford 2001: Tables 4.01 and 5.157
Miwok	158	35	49.5	4950	1212	2.94	867.959	NA	Binford 2001: Tables 4.01 and 5.158
Tekelma	159	20	70	7000	900	3.94	767.587	NA	Binford 2001: Tables 4.01 and 5.159
Yuki (Coast)	160	15	11.2	1120	750	7.81	1546.68	NA	Binford 2001: Tables 4.01 and 5.160
Tolowa	161	10	21	2100	1200	5.97	1513.7	NA	Binford 2001: Tables 4.01 and 5.161
Shasta	162	25	117	11700	2000	2.12	1095.93	NA	Binford 2001: Tables 4.01 and 5.162
Hupa	163	10	12.5	1250	1000	4.81	1374.97	NA	Binford 2001: Tables 4.01 and 5.163
Tututni	164	30	32.8	3280	2200	6.67	1573.62	NA	Binford 2001: Tables 4.01 and 5.164
Karok	165	10	32	3200	1500	4.25	1161.77	NA	Binford 2001: Tables 4.01 and 5.165
Atsugewi	166	40	72.5	7250	1300	0.25	565.136	NA	Binford 2001: Tables 4.01 and 5.166
Wiyot	167	5	13.2	1320	1390	8.53	1079.38	NA	Binford 2001: Tables 4.01 and 5.167
Maidu (Mountain)	168	30	81	8100	1900	-1.39	454.324	NA	Binford 2001: Tables 4.01 and 5.168
Yurok	169	10	19	1900	2500	6.94	1812.74	NA	Binford 2001: Tables 4.01 and 5.169
Achumawi	170	40	98.5	9850	1700	-1.47	477.88	NA	Binford 2001: Tables 4.01 and 5.170
Modoc	171	30	159.2	15920	894	-1.39	258.958	NA	Binford 2001: Tables 4.01 and 5.171
Klamath	172	20	89.8	8980	1200	-2.81	808.325	NA	Binford 2001: Tables 4.01 and 5.172
Guaicura	173	15	162.9	16290	977	14	137.317	NA	Binford 2001: Tables 4.01 and 5.173
Chichimec	174	20	333	33300	3000	15.06	527.485	NA	Binford 2001: Tables 4.01 and 5.174
Death Valley	175	25	32.7	3270	42	11.39	41.422	NA	Binford 2001: Tables 4.01 and 5.175
Karankawa	176	15	133	13300	2800	13.61	839.188	NA	Binford 2001: Tables 4.01 and 5.176
Coahuilenos	177	30	373	37300	600	13.31	253.886	NA	Binford 2001: Tables 4.01 and 5.177
Panamint Shoshoni	178	35	236	23600	500	7.63	96.839	NA	Binford 2001: Tables 4.01 and 5.178
Yavapai	179	35	405	40500	600	7.39	327.416	NA	Binford 2001: Tables 4.01 and 5.179
Koso Mountain Shoshoni	180	40	25.9	2590	222	5.89	122.638	NA	Binford 2001: Tables 4.01 and 5.180
Walapai	181	35	259	25900	1000	6.33	276.98	NA	Binford 2001: Tables 4.01 and 5.181
Kawaiisu Shoshoni	182	40	42	4200	500	4.97	195.948	NA	Binford 2001: Tables 4.01 and 5.182
Saline Valley Shoshoni	183	40	28	2800	65	3.58	135.406	NA	Binford 2001: Tables 4.01 and 5.183
Anotarianunt Southern Paiute	184	35	68	6800	234	0.74	163.539	NA	Binford 2001: Tables 4.01 and 5.184
Owens Valley Paiute	185	30	55.2	5520	2100	2.67	141.961	NA	Binford 2001: Tables 4.01 and 5.185
Kawich Mountain Shoshoni	186	45	52.6	5260	105	1.64	214.081	NA	Binford 2001: Tables 4.01 and 5.186
Kaibab Southern Paiute	187	40	114.6	11460	425	0.81	288.549	NA	Binford 2001: Tables 4.01 and 5.187
Mono Lake Paiute	188	45	28.8	2880	170	1.5	205.86	NA	Binford 2001: Tables 4.01 and 5.188
Deep Spring Paiute	189	45	6.5	650	23	0.69	131.374	NA	Binford 2001: Tables 4.01 and 5.189
Salmon-eater Shoshoni	190	50	57.9	5790	400	-1.78	219.045	NA	Binford 2001: Tables 4.01 and 5.190
Pyramid Lake Paiute	191	20	26.2	2620	485	-1.03	160.113	NA	Binford 2001: Tables 4.01 and 5.191
Ute-timanogas	192	30	138.8	13880	480	-1.72	405.038	NA	Binford 2001: Tables 4.01 and 5.192
Cattail Paiute	193	30	21.8	2180	481	-1.17	120.185	NA	Binford 2001: Tables 4.01 and 5.193
Fish Lake Paiute	194	30	25.7	2570	100	-1.28	105.182	NA	Binford 2001: Tables 4.01 and 5.194
Honey Lake Paiute	195	50	36.3	3630	385	-0.97	285.091	NA	Binford 2001: Tables 4.01 and 5.195
Hukunduka Shoshoni	196	35	337.6	33760	1000	-4.06	374.357	NA	Binford 2001: Tables 4.01 and 5.196
Gosiute Shoshoni	197	40	259.7	25970	435	-2.83	183.259	NA	Binford 2001: Tables 4.01 and 5.197
Spring Valley Shoshoni	198	55	62.6	6260	378	-2.14	295.742	NA	Binford 2001: Tables 4.01 and 5.198
White Knife Shoshoni	199	45	42.7	4270	500	-1.92	265.028	NA	Binford 2001: Tables 4.01 and 5.199
Rainroad Valley Shoshoni	200	45	58.4	5840	250	-2.76	239.443	NA	Binford 2001: Tables 4.01 and 5.200
Reese River Shoshoni	201	40	23.4	2340	390	-1.94	301.862	NA	Binford 2001: Tables 4.01 and 5.201
North River Paiute	202	45	24	2400	385	1.61	813.04	NA	Binford 2001: Tables 4.01 and 5.202
Grouse Creek Shoshoni	203	45	122	12200	200	-4.64	204.161	NA	Binford 2001: Tables 4.01 and 5.203
Utewimonantci	204	55	156	15600	405	-3.61	309.405	NA	Binford 2001: Tables 4.01 and 5.204
Bear Creek Paiute	205	50	54	5400	60	0.06	294.757	NA	Binford 2001: Tables 4.01 and 5.205
Antelope Valley Shoshoni	206	40	58.4	5840	78	-3.28	293.299	NA	Binford 2001: Tables 4.01 and 5.206
Washo	207	37	126	12600	1877	-1.18	326.283	NA	Binford 2001: Tables 4.01 and 5.207
Surprise Valley Paiute	208	30	27	2700	367	-1.53	364.183	NA	Binford 2001: Tables 4.01 and 5.208
Wind River Shoshoni	209	65	960	96000	1500	-7.39	292.555	NA	Binford 2001: Tables 4.01 and 5.209
Ruby Valley Shoshoni	210	37	32.6	3260	450	-3.61	312.572	NA	Binford 2001: Tables 4.01 and 5.210
Bohogue-Northern Shoshoni	211	55	365.4	36540	380	-5.98	250.278	NA	Binford 2001: Tables 4.01 and 5.211
Uintah-ute	212	35	233.7	23370	1750	-9.59	222.256	NA	Binford 2001: Tables 4.01 and 5.212
Harney Valley Paiute	213	35	160.8	16080	200	-3.61	282.402	NA	Binford 2001: Tables 4.01 and 5.213
Sheep-eater Shoshoni	214	55	88.1	8810	550	-8	227.395	NA	Binford 2001: Tables 4.01 and 5.214
Little Smokey Shoshoni	215	55	52.6	5260	96	-5.69	221.383	NA	Binford 2001: Tables 4.01 and 5.215
Uncompahgre Ute	216	50	256.4	25640	1100	-5.61	520.838	NA	Binford 2001: Tables 4.01 and 5.216
Lipan Apache	217	35	980	98000	500	10.97	778.733	NA	Binford 2001: Tables 4.01 and 5.217
Comanche	218	80	1500	150000	3500	6.78	432.467	NA	Binford 2001: Tables 4.01 and 5.218
Chiricahua Apache	219	40	1228.5	122850	1425	6.44	303.62	NA	Binford 2001: Tables 4.01 and 5.219
Kiowa	220	80	280	28000	392	3.28	677.409	NA	Binford 2001: Tables 4.01 and 5.220
Kiowa Apache	221	90	460	46000	1908	0.83	488.003	NA	Binford 2001: Tables 4.01 and 5.221
Cheyenne	222	80	570	57000	2750	-1.83	387.471	NA	Binford 2001: Tables 4.01 and 5.222
Arapahoe	223	80	400	40000	3000	-2.85	411.69	NA	Binford 2001: Tables 4.01 and 5.223
Crow	224	80	800	80000	4650	-7.46	289.941	NA	Binford 2001: Tables 4.01 and 5.224
Teton Lakota	225	90	1450	145000	12725	-6.98	391.875	NA	Binford 2001: Tables 4.01 and 5.225
Kutenai	226	45	595	59500	1200	-4.75	434.58	NA	Binford 2001: Tables 4.01 and 5.226
Bannok	227	50	649	64900	1500	-7.36	225.625	NA	Binford 2001: Tables 4.01 and 5.227
Gros-Ventre	228	80	670	67000	2260	-10.06	309.992	NA	Binford 2001: Tables 4.01 and 5.228
Plains Ojibwa	229	75	716.8	71680	2000	-15.03	456.868	NA	Binford 2001: Tables 4.01 and 5.229
Peigan	230	80	600	60000	1525	-10.56	239.101	NA	Binford 2001: Tables 4.01 and 5.230
Blackfoot	231	75	700	70000	2425	-14.94	227.737	NA	Binford 2001: Tables 4.01 and 5.231
Assiniboine	232	70	1400	140000	4500	-16.15	308.8	NA	Binford 2001: Tables 4.01 and 5.232
Plains Cree	233	75	1700	170000	4650	-18	272.84	NA	Binford 2001: Tables 4.01 and 5.233
Blood	234	55	490	49000	250	-23.03	404.917	NA	Binford 2001: Tables 4.01 and 5.234
Sarsi	235	82	400	40000	700	-15.44	300.079	NA	Binford 2001: Tables 4.01 and 5.235
Squamish	236	25	30	3000	1700	4.06	904.883	NA	Binford 2001: Tables 4.01 and 5.236
Alsea	237	15	15.5	1550	1500	4.52	1319.45	NA	Binford 2001: Tables 4.01 and 5.237
Puyallup	238	15	12	1200	441	3.58	1102	NA	Binford 2001: Tables 4.01 and 5.238
Twana	239	20	29.8	2980	800	3.02	1778.38	NA	Binford 2001: Tables 4.01 and 5.239
Chehalis	240	20	182	18200	4000	3.52	1515.39	NA	Binford 2001: Tables 4.01 and 5.240
Nootka	241	5	91	9100	14000	2	1397.41	NA	Binford 2001: Tables 4.01 and 5.241
Chinook	242	10	148	14800	5000	4.07	1725.85	NA	Binford 2001: Tables 4.01 and 5.242
Coos	243	10	19.2	1920	2000	7.26	1629.09	NA	Binford 2001: Tables 4.01 and 5.243
Lillooet	244	40	170	17000	4000	-3.89	413.862	NA	Binford 2001: Tables 4.01 and 5.244
Lummi	245	15	4.1	410	459	3.35	659.845	NA	Binford 2001: Tables 4.01 and 5.245
Quinault	246	15	28.3	2830	2412	3.98	2597.93	NA	Binford 2001: Tables 4.01 and 5.246
Stalo	247	15	25	2500	1650	2.74	785.987	NA	Binford 2001: Tables 4.01 and 5.247
Cowichan	248	30	10	1000	347	3.28	861.044	NA	Binford 2001: Tables 4.01 and 5.248
Tillamook	249	25	36.3	3630	1500	5.56	2354.42	NA	Binford 2001: Tables 4.01 and 5.249
Comox	250	15	45	4500	2475	2.86	1249.17	NA	Binford 2001: Tables 4.01 and 5.250
Bella-bella	251	20	97.5	9750	2000	2.25	3152.68	NA	Binford 2001: Tables 4.01 and 5.251
Quileute	252	15	12.7	1270	1324	4.11	2692.45	NA	Binford 2001: Tables 4.01 and 5.252
Clallam	253	20	33.9	3390	2400	3.3	1061.77	NA	Binford 2001: Tables 4.01 and 5.253
Makah	254	10	2.7	270	332	4.07	2372.87	NA	Binford 2001: Tables 4.01 and 5.254
Haisla	255	35	68.2	6820	1300	-3.56	3472.4	NA	Binford 2001: Tables 4.01 and 5.255
Kwakiutl	256	10	211	21100	14500	3.44	1462.14	NA	Binford 2001: Tables 4.01 and 5.256
Tsimshim	257	20	241	24100	10100	-1.83	1839.64	NA	Binford 2001: Tables 4.01 and 5.257
Haida	258	10	103	10300	10000	2.11	1778.16	NA	Binford 2001: Tables 4.01 and 5.258
Bella-coola	259	25	150	15000	1950	-3.94	1986.22	NA	Binford 2001: Tables 4.01 and 5.259
Tlingit	260	15	1050	105000	12000	-0.96	1958.37	NA	Binford 2001: Tables 4.01 and 5.260
Gitksan	261	30	127.2	12720	3000	-7.65	664.746	NA	Binford 2001: Tables 4.01 and 5.261
Konaig	262	5	287	28700	8800	-1.22	1479	NA	Binford 2001: Tables 4.01 and 5.262
Eyak	263	10	26.6	2660	156	-12.58	1291.42	NA	Binford 2001: Tables 4.01 and 5.263
Kuskowagmut	264	20	416	41600	7200	-16.75	508.996	NA	Binford 2001: Tables 4.01 and 5.264
Chugash	265	10	262	26200	1700	-9.09	1373.58	NA	Binford 2001: Tables 4.01 and 5.265
Aleut	266	5	247	24700	13500	-2.22	897.857	NA	Binford 2001: Tables 4.01 and 5.266
Nunavak	267	15	45	4500	864	-12	385.672	NA	Binford 2001: Tables 4.01 and 5.267
Tenino	268	20	79.5	7950	1510	0	218.643	NA	Binford 2001: Tables 4.01 and 5.268
Umatiela	269	30	110	11000	1155	0.3	259.715	NA	Binford 2001: Tables 4.01 and 5.269
Wenatchi	270	25	84.5	8450	5000	-3.5	398.571	NA	Binford 2001: Tables 4.01 and 5.270
Yakima	271	25	140.8	14080	3780	-2.09	238.473	NA	Binford 2001: Tables 4.01 and 5.271
Wishram	272	15	9.2	920	2132	-0.22	535.057	NA	Binford 2001: Tables 4.01 and 5.272
Coeur d'Alene	273	55	666	66600	1000	-2.61	697.004	NA	Binford 2001: Tables 4.01 and 5.273
Sinkaietk	274	25	60.3	6030	875	-6.06	317.892	NA	Binford 2001: Tables 4.01 and 5.274
Okanogan	275	30	113.1	11310	1500	-5.74	341.04	NA	Binford 2001: Tables 4.01 and 5.275
Sanpoil	276	35	61.4	6140	687	-4.97	374.662	NA	Binford 2001: Tables 4.01 and 5.276
Nez-perce	277	15	450	45000	4000	-3.11	547.036	NA	Binford 2001: Tables 4.01 and 5.277
Thompson	278	25	155	15500	5150	-5.39	200.277	NA	Binford 2001: Tables 4.01 and 5.278
Kalispel	279	35	666	66600	1000	-4.33	721.07	NA	Binford 2001: Tables 4.01 and 5.279
Ojibwa (Kitchibaun)	280	40	600	60000	3000	-7.39	754.082	NA	Binford 2001: Tables 4.01 and 5.280
Kitikitegon	281	45	24.6	2460	76	-11.97	811.896	NA	Binford 2001: Tables 4.01 and 5.281
Micmac	282	55	1017	101700	2359	-8.7	735.411	NA	Binford 2001: Tables 4.01 and 5.282
Flathead	283	60	533	53300	800	-6.17	405.433	NA	Binford 2001: Tables 4.01 and 5.283
Rainy River Ojibwa	284	60	190.1	19010	230	-15.65	594.096	NA	Binford 2001: Tables 4.01 and 5.284
Northern Saulteaux	285	65	154.2	15420	185	-18.24	375.602	NA	Binford 2001: Tables 4.01 and 5.285
Shuswap	286	30	1176	117600	14582	-8.43	427.106	NA	Binford 2001: Tables 4.01 and 5.286
Pekangekum Ojibwa	287	60	124	12400	382	-18.69	389.448	NA	Binford 2001: Tables 4.01 and 5.287
Round Lake Ojibwa	288	65	142.9	14290	250	-21.22	452.671	NA	Binford 2001: Tables 4.01 and 5.288
Alcatcho	289	55	54	5400	405	-6.76	617.497	NA	Binford 2001: Tables 4.01 and 5.289
Nipigon Ojibwa	290	55	255	25500	221	-18.85	456.194	NA	Binford 2001: Tables 4.01 and 5.290
Mistassini Cree	291	74	779	77900	450	-17.96	602.352	NA	Binford 2001: Tables 4.01 and 5.291
Ojibwa (Northern Albany)	292	60	157.4	15740	225	-20.28	465.933	NA	Binford 2001: Tables 4.01 and 5.292
Waswanip Cree	293	55	358	35800	150	-18.89	677.228	NA	Binford 2001: Tables 4.01 and 5.293
Weagamon Ojibwa	294	85	700	70000	3110	-13.17	317.284	NA	Binford 2001: Tables 4.01 and 5.294
Montagnais	295	50	6600	660000	2700	-14.5	509.478	NA	Binford 2001: Tables 4.01 and 5.295
Sekani	296	60	800	80000	656	-13.26	269.604	NA	Binford 2001: Tables 4.01 and 5.296
Beaver	297	55	1947	194700	1000	-21.75	243.626	NA	Binford 2001: Tables 4.01 and 5.297
Slave	298	60	2453.7	245370	1350	-25.7	222.606	NA	Binford 2001: Tables 4.01 and 5.298
Kaska	299	65	600	60000	396	-23.31	242.494	NA	Binford 2001: Tables 4.01 and 5.299
Tahltan	300	60	700	70000	810	-14.52	266.38	NA	Binford 2001: Tables 4.01 and 5.300
Chilcotin	301	40	217	21700	2500	-10	225.182	NA	Binford 2001: Tables 4.01 and 5.301
Carrier	302	60	70	7000	525	-10.44	196.371	NA	Binford 2001: Tables 4.01 and 5.302
Mountain	303	75	1000	100000	780	-28.14	195.313	NA	Binford 2001: Tables 4.01 and 5.303
Han	304	70	550.8	55080	1000	-26.44	246.437	NA	Binford 2001: Tables 4.01 and 5.304
Hare	305	65	1734	173400	572	-29	180.112	NA	Binford 2001: Tables 4.01 and 5.305
Attawapiskat Cree	306	40	3120	312000	4460	-22.69	454.547	NA	Binford 2001: Tables 4.01 and 5.306
Koyukon	307	60	1825	182500	2000	-23.72	350.498	NA	Binford 2001: Tables 4.01 and 5.307
Chippewyan	308	70	6194	619400	2850	-26.39	221.556	NA	Binford 2001: Tables 4.01 and 5.308
Kutchin	309	65	2861	286100	4863	-27	156.16	NA	Binford 2001: Tables 4.01 and 5.309
Ingalik	310	43	690	69000	1500	-19.35	488.294	NA	Binford 2001: Tables 4.01 and 5.310
Satudene	311	75	1500	150000	825	-27.74	173.347	NA	Binford 2001: Tables 4.01 and 5.311
Nabesna	312	69	210	21000	140	-24.78	271.756	NA	Binford 2001: Tables 4.01 and 5.312
Rupert House Cree	313	56	500	50000	450	-21.67	464.327	NA	Binford 2001: Tables 4.01 and 5.313
Dogrib	314	66	1809	180900	1590	-27.76	150.478	NA	Binford 2001: Tables 4.01 and 5.314
Tanaina	315	51	925	92500	4500	-10.7	500.25	NA	Binford 2001: Tables 4.01 and 5.315
Tutchone	316	62	1620	162000	1500	-21.39	158.135	NA	Binford 2001: Tables 4.01 and 5.316
Holikachuk	317	36	216.4	21640	330	-16.25	521.553	NA	Binford 2001: Tables 4.01 and 5.317
Naskapi	318	73	960	96000	400	-22.02	327.006	NA	Binford 2001: Tables 4.01 and 5.318
Norton Sound Inuit	319	15	210	21000	1600	-20.17	472.809	NA	Binford 2001: Tables 4.01 and 5.319
Kobuk Inuit	320	63	187	18700	500	-22.58	287.45	NA	Binford 2001: Tables 4.01 and 5.320
Kotzebue Sound Inuit	321	21	147	14700	975	-20.89	239.692	NA	Binford 2001: Tables 4.01 and 5.321
Labrador Inuit	322	29	525	52500	1460	-20.47	325.905	NA	Binford 2001: Tables 4.01 and 5.322
Great Whale Inuit	323	18	242	24200	450	-23.72	304.096	NA	Binford 2001: Tables 4.01 and 5.323
Caribou Inuit	324	55	2365	236500	700	-33	150.519	NA	Binford 2001: Tables 4.01 and 5.324
Noatak Inuit	325	75	250	25000	550	-25.47	231.684	NA	Binford 2001: Tables 4.01 and 5.325
Nunamiut Inuit	326	89	249	24900	240	-25.39	225.466	NA	Binford 2001: Tables 4.01 and 5.326
Mackenzie Inuit	327	38	650	65000	2500	-28.42	142.966	NA	Binford 2001: Tables 4.01 and 5.327
Sivokamiut Inuit	328	10	40	4000	600	-17.74	304.528	NA	Binford 2001: Tables 4.01 and 5.328
Point Hope Inuit	329	35	107.1	10710	450	-24.08	181.759	NA	Binford 2001: Tables 4.01 and 5.329
Copper Inuit	330	25	4620	462000	2000	-32.98	85.403	NA	Binford 2001: Tables 4.01 and 5.330
Utkuhikhalingmiut	331	30	431	43100	164	-33.56	106.857	NA	Binford 2001: Tables 4.01 and 5.331
Aivilingmiut Inuit	332	35	400	40000	130	-31.22	114.512	NA	Binford 2001: Tables 4.01 and 5.332
Ingulik Inuit	333	15	2210	221000	390	-30.83	91.58	NA	Binford 2001: Tables 4.01 and 5.333
West Greenland	334	15	1080	108000	5112	-11.89	331.931	NA	Binford 2001: Tables 4.01 and 5.334
Baffin Islan Inuit	335	5	3706	370600	6000	-27.08	117.73	NA	Binford 2001: Tables 4.01 and 5.335
Netsilik Inuit	336	25	1970	197000	500	-34.33	63.193	NA	Binford 2001: Tables 4.01 and 5.336
Angmaksaslik	337	10	73.5	7350	413	-6.89	869.503	NA	Binford 2001: Tables 4.01 and 5.337
Tareumiut Inuit	338	25	142.5	14250	550	-28	113.557	NA	Binford 2001: Tables 4.01 and 5.338
Polar Inuit	339	30	731	73100	300	-23.33	120.049	NA	Binford 2001: Tables 4.01 and 5.339
